# Supplementary material
Source: publisher figshare collection journal article supplement (https://sage.figshare.com/ndownloader/files/13627550)
Supplement: Supplementary file 1 [file 13627550]

## SUPPLEMENTAL INFORMATION

**Table S1** Semi-structured interview guide user for practitioner involved in demand reduction campaigns for elephant ivory and rhino horn in China and Vietnam

---

|                                                                                                                                                                                                                                                                                                                                                                                                                                                                                                                                                         |
|---------------------------------------------------------------------------------------------------------------------------------------------------------------------------------------------------------------------------------------------------------------------------------------------------------------------------------------------------------------------------------------------------------------------------------------------------------------------------------------------------------------------------------------------------------|
| <b>Organizational position</b>                                                                                                                                                                                                                                                                                                                                                                                                                                                                                                                          |
| <ul style="list-style-type: none"><li>• Aims of the organization to ensure it has a biodiversity conservation focus</li><li>• Role of interviewee in the organisation</li><li>• Past demand reduction activities in the context of wildlife trade, in particular rhino horn or elephant ivory in China or Vietnam</li></ul>                                                                                                                                                                                                                             |
| <b>Adherence to social marketing benchmarks</b>                                                                                                                                                                                                                                                                                                                                                                                                                                                                                                         |
| <ul style="list-style-type: none"><li>• Setting of goals for target behaviours</li><li>• Selection of the target audience</li><li>• Use of behavioural theories in campaign design</li><li>• Capture and use of actionable audience insights</li><li>• Framing and communicating ‘benefits’ and ‘costs’ of desired behaviour</li><li>• Considering and assessing the role of ‘competition’ (for time, attention and inclination to act)</li><li>• Segmenting the target audience into groups</li><li>• Considering a mix of marketing methods</li></ul> |
| <b>Implementation challenges and opportunities</b>                                                                                                                                                                                                                                                                                                                                                                                                                                                                                                      |
| <ul style="list-style-type: none"><li>• Describing key campaign successes</li><li>• Describing key campaign challenges</li><li>• Opportunities and challenges of implementing a social marketing approach to demand reduction of ivory and rhino horn in China and Viet Nam</li></ul>                                                                                                                                                                                                                                                                   |

---

**Table S2** Definition of levels used for analysis of compliance with the Social Marketing benchmarks defined by the UK’s National Social Marketing Centre

| <b>Criteria</b>             | <b>No evidence</b>                                                                                                | <b>Some evidence</b>                                                                                                                                        | <b>Substantial evidence</b>                                                                                                                                                          |
|-----------------------------|-------------------------------------------------------------------------------------------------------------------|-------------------------------------------------------------------------------------------------------------------------------------------------------------|--------------------------------------------------------------------------------------------------------------------------------------------------------------------------------------|
| <b>Customer Orientation</b> | No evidence of research to ascertain customer habits, preferences and aspirations.                                | Some customer research is evident. This may be at a ‘general public’ level, or consider limited information on one of; habits, preferences and aspirations. | Evidence of significant research into customer habits, preferences and aspirations, drawing on proprietary and/or external sources.                                                  |
| <b>Behaviour</b>            | No specific behavioural outcome is stated. No analysis of either current or desired behaviour is evident.         | Evidence of some behavioural analysis for either current or desired behaviour.                                                                              | Behavioural analysis evident for both current and desired behaviours. Actionable, and measureable goals are evident.                                                                 |
| <b>Theory</b>               | No specific behavioural theory is considered.                                                                     | Limited reference in the design approach to relevant theory of behaviour, or change. Evidence of one theory applied toward multiple customer segments.      | Significant elements of campaign design are built upon theory of behaviour, and/or theory of change. May be used in different combinations according to different customer segments. |
| <b>Insight</b>              | No evidence of a researched understanding of what ‘moves and motivates’ the customer.                             | Evidence of actionable insights that focus on the priority areas that ‘move and motivate’ toward desired behaviour.                                         | Significant evidence of actionable insights drawn from research, which are targeted toward specific customer segments. Does not take a ‘one size fits all’ approach.                 |
| <b>Exchange</b>             | No analysis of the ‘cost’ (Financial, Social, Physical, Time) of the desired behaviour. No evidence of incentives | Some evidence of analysis, of both actual and perceived costs against actual and perceived benefits of                                                      | Evidence of targeted use of incentives and disincentives built upon analysis of the segment’s perception of ‘cost’ vs ‘benefit’ of desired                                           |

|                     |                                                                                                                                   |                                                                                                                                        |                                                                                                                                                          |
|---------------------|-----------------------------------------------------------------------------------------------------------------------------------|----------------------------------------------------------------------------------------------------------------------------------------|----------------------------------------------------------------------------------------------------------------------------------------------------------|
|                     | and/or disincentives.                                                                                                             | desired behaviour.                                                                                                                     | behaviour.                                                                                                                                               |
| <b>Competition</b>  | No evidence of analysis toward understanding what competes against the desired behaviour (Social, Psychological, Time, Financial) | Evidence of some competition analysis. May be focused on either internal or external factors, and/or focused on broad customer groups. | Evidence of understanding both internal and external factors of competition in campaign design. Segmented strategies to minimise 'distractions' evident. |
| <b>Segmentation</b> | No evidence of specific identification of different customer groups. Approach may be toward 'the general public'.                 | Limited segmentation is evident, based upon demographic measures, or very broad groups.                                                | Specific segmentation is evident, which effectively targets segments in the most appropriate ways according to identified insights.                      |
| <b>Methods mix</b>  | No 'mix' of Product, Price, Place and Promotion is evident. Design focuses on no more than one method.                            | More than one method is evident, and may be used across multiple segments.                                                             | Multiple methods are evident, and may be used in different combinations according to different customer segments.                                        |

---

**Table S3** Organizations found to have conducted demand reduction campaigns for consumers of elephant ivory and rhino horn in Vietnam from 2005 to 2015

| <b>Organisation</b>                    | <b>Geographic focus</b> | <b>Thematic focus</b>                       | <b>Participation</b> |
|----------------------------------------|-------------------------|---------------------------------------------|----------------------|
| Breaking the Brand                     | Viet Nam                | Wildlife trade                              | Accepted             |
| Clinton Global Initiative              | Global                  | International development                   | No response          |
| Conservation International             | Global                  | Biodiversity conservation                   | No response          |
| Coalition Against Wildlife Trafficking | Global                  | Wildlife trade                              | No response          |
| Education for Nature Viet Nam          | Viet Nam                | Biodiversity conservation                   | Accepted             |
| Freeland                               | Asia                    | Wildlife trade                              | Declined             |
| Human Society International            | Global                  | Animal welfare                              | No response          |
| International Fund for Animal Welfare  | Global                  | Animal welfare                              | Accepted             |
| Investec                               | Global                  | Asset Management                            | Declined             |
| Rattle the Cage Productions            | Asia                    | Wildlife trade                              | No response          |
| Royal Foundation                       | Global                  | Public Health and Biodiversity conservation | Accepted             |
| The Nature Conservancy                 | Global                  | Biodiversity conservation                   | No response          |
| TRAFFIC                                | Global                  | Wildlife trade                              | Accepted             |
| World Conservation Society             | Global                  | Biodiversity conservation                   | Declined             |
| Stop Ivory                             | Global                  | Wildlife trade                              | No response          |
| WildAct                                | Viet Nam                | Wildlife trade                              | Accepted             |
| Wildaid                                | Asia                    | Wildlife trade                              | Accepted             |
| Wilderness Foundation                  | Viet Nam                | Biodiversity conservation                   | No response          |
